# Supplementary material
Source: PubMed Central journal article supplement (PMC5983332)
Supplement: jci-128-97924-s113.pdf [file jci-128-97924-s113.pdf]

## **Supplemental Experimental Procedures**

### **Evaluation of Paclitaxel and Decitabine Combination treatment in PDXs Spheroids**

Tumor spheroids were cultured with full MEF medium with 5  $\mu$ M ROCK inhibitor for 3-5 days followed by pretreating with full medium containing 50 nM or 100 nM decitabine for four days. Addition of different concentrations of paclitaxel together with 50 nM or 100 nM decitabine was then added and treated for additional 3 days. Each treatment was performed in triplicate. Fresh decitabine was added daily. Cell viability was performed using the CellTiter-Glo 3D Cell Viability Assay Kit (Promega) according to the procedure provided by the manufacture. The luminescent signal was measured using a Safire2 plate reader. Percent viability was corrected back to vehicle.

### **Supplemental Figure Legends**

Supplemental Figure S1. **Organoid treatment response to therapy.** Cell viability of organoids that expressing either high DNMTs (A) or low DNMTs (B), in response to different concentration of paclitaxel alone or in combination with 50 nM or 100 nM decitabine. Data represents mean  $\pm$  SEM (n=3). \*\*\*P < 0.001, and \*\*\*\*P < 0.0001 by 2-way ANOVA.

Supplemental Figure S1

A

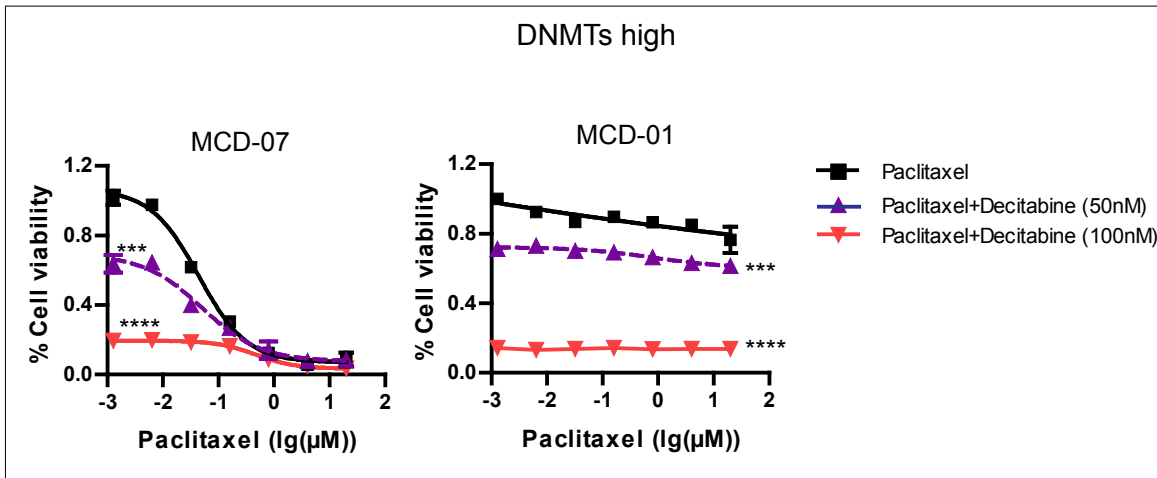

B

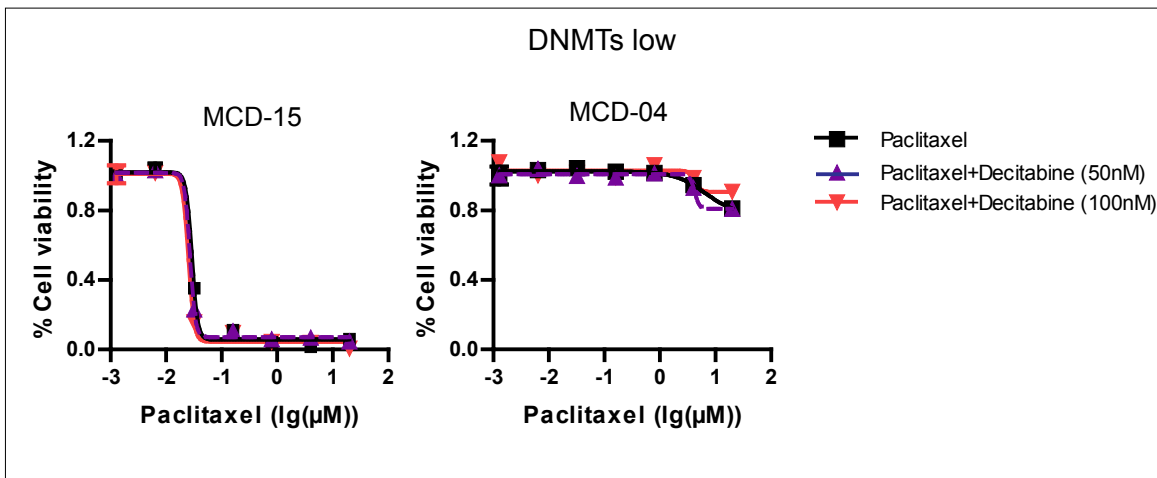

Supplemental Figure S1. **Organoid treatment response to therapy.** Cell viability of organoids that expressing either high DNMTs (A) or low DNMTs (B), in response to different concentration of paclitaxel alone or in combination with 50 nM or 100 nM decitabine. Data represents mean  $\pm$  SEM (n=3). \*\*\*P < 0.001, and \*\*\*\*P < 0.0001 by 2-way ANOVA.

**Supplemental Table S1. Patient Tumor Information and Decitabine Drug Response in both PDX organoids and in mice**

| Patient Tumor Information |                  |              |                                |                              |                               |             | Decitabine Response |  |  |
|---------------------------|------------------|--------------|--------------------------------|------------------------------|-------------------------------|-------------|---------------------|--|--|
| ID                        | Clinical subtype | Tumor Origin | Clinical Chemotherapy Response | Organoid Decitabine Response | Xenograft Decitabine Response | Concordance |                     |  |  |
| MCD-01                    | TN               | PostChemo    | Resistant                      | Yes                          | Yes                           | Y           |                     |  |  |
| MCD-02                    | TN               | Baseline     | Sensitive                      | No                           | No                            | Y           |                     |  |  |
| MCD-03                    | TN               | Baseline     | Resistant                      | Yes                          | Yes                           | Y           |                     |  |  |
| MCD-04                    | TN               | Baseline     | Resistant                      | No                           | No                            | Y           |                     |  |  |
| MCD-05                    | TN               | Baseline     | Resistant                      | No                           | No                            | Y           |                     |  |  |
| MCD-06                    | TN               | Baseline     | Resistant                      | No                           |                               |             |                     |  |  |
| MCD-07                    | TN               | Baseline     | Sensitive                      | Yes                          |                               |             |                     |  |  |
| MCD-08                    | TN               | Baseline     | Sensitive                      | Yes                          |                               |             |                     |  |  |
| MCD-09                    | TN               | Baseline     | Sensitive                      | No                           |                               |             |                     |  |  |
| MCD-10                    | TN               | Baseline     | Sensitive                      | Yes                          |                               |             |                     |  |  |
| MCD-11                    | TN               | Baseline     | Sensitive                      | Yes                          | Yes                           | Y           |                     |  |  |
| MCD-12                    | TN               | Baseline     | Resistant                      | Yes                          |                               |             |                     |  |  |
| MCD-13                    | TN               | Baseline     | Sensitive                      | Moderate                     |                               |             |                     |  |  |
| MCD-14                    | TN               | Baseline     | Sensitive                      | Moderate                     |                               |             |                     |  |  |
| MCD-15                    | TN               | Baseline     | Sensitive                      | No                           |                               |             |                     |  |  |

**Supplemental Table S2: Methylation level at the 9 different CpGs at traf6 gene promoter**

|          |          | Methylation level (%) |        |        |
|----------|----------|-----------------------|--------|--------|
|          |          | Pos. 1                | Pos. 2 | Pos. 3 |
| TRAF6_a1 | AU565    | 0.8                   | 1.6    | 0.0    |
| TRAF6_a1 | AU565    | 1.2                   | 1.3    | 0.0    |
| TRAF6_a1 | BT549    | 14.4                  | 2.2    | 3.2    |
| TRAF6_a1 | BT549    | 13.2                  | 2.1    | 3.1    |
| TRAF6_a1 | CAMA-1   | 0.9                   | 1.4    | 0.0    |
| TRAF6_a1 | CAMA-1   | 1.2                   | 1.1    | 1.6    |
| TRAF6_a1 | BT747    | 1.1                   | 1.4    | 0.0    |
| TRAF6_a1 | BT747    | 0.7                   | 1.2    | 1.4    |
| TRAF6_a1 | Hs 578T  | 0.7                   | 1.2    | 0.0    |
| TRAF6_a1 | Hs 578T  | 1.3                   | 1.1    | 1.7    |
| TRAF6_a1 | MDA231   | 1.5                   | 1.3    | 1.1    |
| TRAF6_a1 | MDA231   | 1.3                   | 1.2    | 2.3    |
| TRAF6_a1 | MDA361   | 1.6                   | 1.4    | 0.0    |
| TRAF6_a1 | MDA361   | 1.7                   | 0.9    | 1.4    |
| TRAF6_a1 | MDA468   | 1.2                   | 1.3    | 1.0    |
| TRAF6_a1 | MDA468   | 1.0                   | 1.5    | 2.0    |
| TRAF6_a1 | MCF7     | 0.7                   | 1.0    | 0.0    |
| TRAF6_a1 | MCF7     | 1.3                   | 1.0    | 1.6    |
| TRAF6_a1 | ZR75-1   | 1.0                   | 1.2    | 0.0    |
| TRAF6_a1 | ZR75-1   | 1.3                   | 0.8    | 1.7    |
| TRAF6_a1 | Ctrl DNA | 85.4                  | 87.6   | 87.4   |

|          |         | Pos. 1 | Pos. 2 | Pos. 3 | Pos. 4 | Pos. 5 | Pos. 6 | Pos. 7 |
|----------|---------|--------|--------|--------|--------|--------|--------|--------|
| TRAF6_a2 | AU565   | 2.4    | 0.9    | 1.8    | 2.3    | 1.6    | 1.2    | 1.5    |
| TRAF6_a2 | AU565   | 2.3    | 0.8    | 1.9    | 2.4    | 1.9    | 1.4    | 2.0    |
| TRAF6_a2 | BT549   | 2.4    | 0.9    | 1.9    | 2.1    | 1.8    | 1.1    | 1.1    |
| TRAF6_a2 | BT549   | 2.6    | 0.9    | 1.9    | 2.0    | 2.6    | 1.8    | 2.7    |
| TRAF6_a2 | CAMA-1  | 2.5    | 1.0    | 1.9    | 2.3    | 2.1    | 1.4    | 1.8    |
| TRAF6_a2 | CAMA-1  | 2.5    | 0.7    | 1.8    | 1.8    | 2.4    | 1.8    | 2.7    |
| TRAF6_a2 | BT747   | 2.5    | 1.2    | 2.2    | 2.6    | 2.0    | 2.1    | 2.0    |
| TRAF6_a2 | BT747   | 2.6    | 1.1    | 4.4    | 2.7    | 3.2    | 1.9    | 3.5    |
| TRAF6_a2 | Hs 578T | 2.3    | 1.1    | 1.6    | 1.9    | 1.5    | 0.9    | 1.3    |
| TRAF6_a2 | Hs 578T | 2.3    | 1.1    | 4.6    | 1.7    | 2.7    | Failed | Failed |
| TRAF6_a2 | MDA231  | 2.5    | 1.1    | 1.8    | 3.2    | 2.0    | 1.2    | 2.0    |
| TRAF6_a2 | MDA231  | 3.5    | 1.2    | 2.1    | 3.9    | 4.3    | 2.2    | 3.7    |

|          |         |      |      |      |      |      |      |        |
|----------|---------|------|------|------|------|------|------|--------|
| TRAF6_a2 | MDA361  | 2.7  | 0.7  | 3.1  | 1.4  | 1.8  | 0.9  | 1.6    |
| TRAF6_a2 | MDA361  | 2.4  | 8.9  | 1.8  | 2.2  | 2.2  | 1.6  | 2.9    |
| TRAF6_a2 | MDA468  | 2.4  | 0.8  | 1.8  | 1.6  | 1.6  | 1.4  | 1.8    |
| TRAF6_a2 | MDA468  | 2.5  | 1.0  | 1.7  | 1.8  | 2.7  | 3.9  | 2.8    |
| TRAF6_a2 | MCF7    | 2.0  | 1.1  | 1.5  | 1.7  | 1.4  | 0.9  | 1.6    |
| TRAF6_a2 | MCF7    | 2.4  | 0.9  | 1.6  | 1.4  | 2.4  | 1.8  | 3.0    |
| TRAF6_a2 | ZR75-1  | 2.3  | 3.2  | 1.9  | 2.2  | 1.4  | 1.0  | 1.3    |
| TRAF6_a2 | ZR75-1  | 2.6  | 1.0  | 1.9  | 1.9  | 2.9  | 1.9  | Failed |
| TRAF6_a2 | Ctr DNA | 75.1 | 82.0 | 75.9 | 69.3 | 78.3 | 44.2 | 60.6   |

|          |         | Pos. 1 | Pos. 2 | Pos. 3 | Pos. 4 | Pos. 5 | Pos. 6 | Pos. 7 | Pos. 8 | Pos. 9 |
|----------|---------|--------|--------|--------|--------|--------|--------|--------|--------|--------|
| TRAF6_a4 | AU565   | 0.8    | 0.9    | 0.8    | 0.5    | 1.8    | 1.6    | 1.3    | 0.7    | 0.5    |
| TRAF6_a4 | AU565   | 0.6    | 1.1    | 0.9    | 0.0    | 1.8    | 1.7    | 1.9    | 0.6    | 0.6    |
| TRAF6_a4 | BT549   | 0.5    | 1.0    | 0.6    | 0.5    | 1.7    | 2.2    | 1.8    | 0.6    | 0.7    |
| TRAF6_a4 | BT549   | 0.7    | 0.8    | 0.5    | 0.5    | 2.0    | 1.6    | 1.7    | 0.8    | 0.0    |
| TRAF6_a4 | CAMA-1  | 1.1    | 0.6    | 0.7    | 0.7    | 2.0    | 3.8    | 1.2    | 1.0    | 0.0    |
| TRAF6_a4 | CAMA-1  | 0.7    | 1.1    | 0.7    | 0.0    | 1.7    | 1.6    | 1.4    | 0.0    | 0.0    |
| TRAF6_a4 | BT747   | 0.8    | 1.0    | 0.7    | 0.5    | 2.0    | 2.0    | 1.2    | 0.7    | 0.6    |
| TRAF6_a4 | BT747   | 0.6    | 0.6    | 0.8    | 0.0    | 1.6    | 1.4    | 1.1    | 0.7    | 0.0    |
| TRAF6_a4 | Hs 578T | 1.0    | 0.6    | 0.8    | 0.6    | 2.1    | 1.3    | 1.1    | 2.2    | 0.0    |
| TRAF6_a4 | Hs 578T | 0.8    | 0.9    | 0.8    | 0.5    | 1.9    | 1.6    | 1.2    | 0.0    | 0.7    |
| TRAF6_a4 | MDA231  | 0.8    | 1.2    | Failed | 0.0    | 2.0    | 2.3    | 1.5    | 0.7    | 2.2    |
| TRAF6_a4 | MDA231  | 0.9    | 0.7    | 0.8    | 0.5    | 2.0    | 1.2    | 1.3    | 0.0    | 1.7    |
| TRAF6_a4 | MDA361  | 1.0    | 0.7    | 0.6    | 0.0    | 2.1    | 1.5    | 0.8    | 0.0    | 0.0    |
| TRAF6_a4 | MDA361  | 1.2    | 1.4    | 0.7    | 0.6    | 1.9    | 1.9    | 1.3    | 0.9    | 0.8    |
| TRAF6_a4 | MDA468  | 0.7    | 0.8    | 0.6    | 0.4    | 1.9    | 1.6    | 1.4    | 0.7    | 0.5    |
| TRAF6_a4 | MDA468  | 0.9    | 0.8    | 0.5    | 0.5    | 1.7    | 0.4    | 1.4    | 0.6    | 0.0    |
| TRAF6_a4 | MCF7    | 0.6    | 0.7    | 0.5    | 0.0    | 1.8    | 1.3    | 0.9    | 0.0    | 0.0    |
| TRAF6_a4 | MCF7    | 0.6    | 0.9    | 0.5    | 0.4    | 1.4    | 0.6    | 1.2    | 0.5    | 0.6    |
| TRAF6_a4 | ZR75-1  | 0.7    | 1.2    | 0.6    | 0.6    | 2.1    | 1.5    | 1.4    | 0.0    | 0.5    |
| TRAF6_a4 | ZR75-1  | 0.7    | 0.9    | 0.5    | 0.0    | 0.5    | 1.1    | 1.6    | 0.0    | 0.0    |
| TRAF6_a4 | Ctr DNA | 85.1   | 81.4   | 82.9   | 83.7   | 80.5   | 80.6   | 85.5   | 79.5   | 74.9   |

\* Note: Ctr DNA was treated with methylase, and represented the high methylaiton levels for these CpG sites. Each sample was in duplicates.
